# Supplementary material
Source: HighWire-hosted journal article supplement (http://www.qdcxjkg.com/highwire/filestream/113578/field_highwire_adjunct_files/0/ERJ-01070-2012_Disclosures.pdf)
Supplement: ERJ-01070-2012_Disclosures.pdf [file ERJ-01070-2012_Disclosures.pdf]

**S. Provencher** has received speaker fees from Actelion Canada, Eli Lilly, Glaxo-Smith-Kline Canada and Pfizer Canada, and consultant fees from Actelion, Eli Lilly, Glaxo-Smith-Kline Canada, Pfizer Canada and Unither Biotech.
